# Supplementary material
Source: Springer Nature journal article supplement (https://www.springermedizin.de/resource/supplementary/12935_2011_322_MOESM3_ESM.pdf/9540288)

A

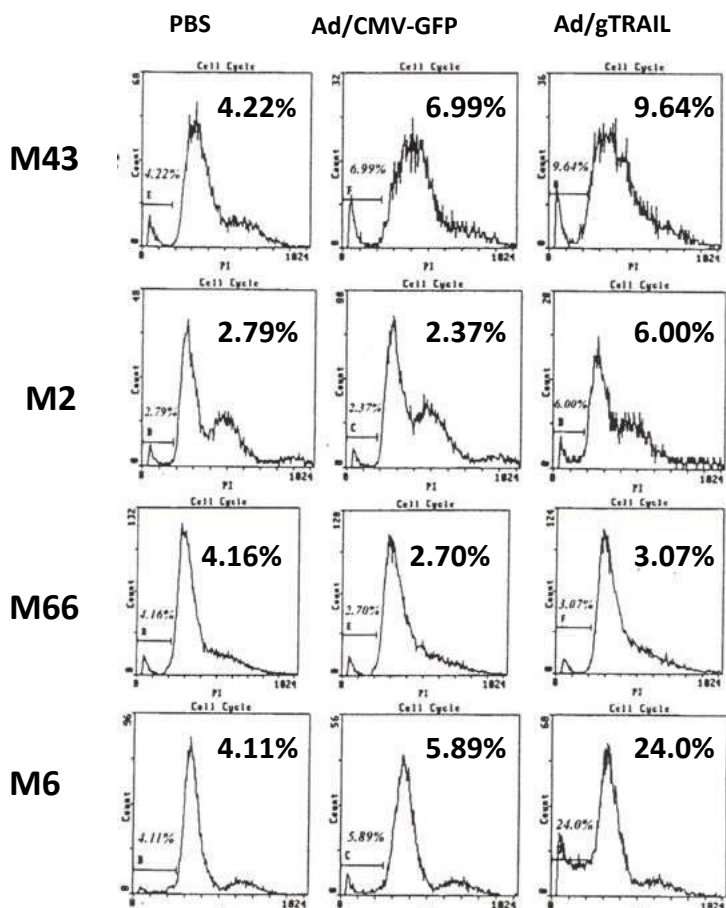

B

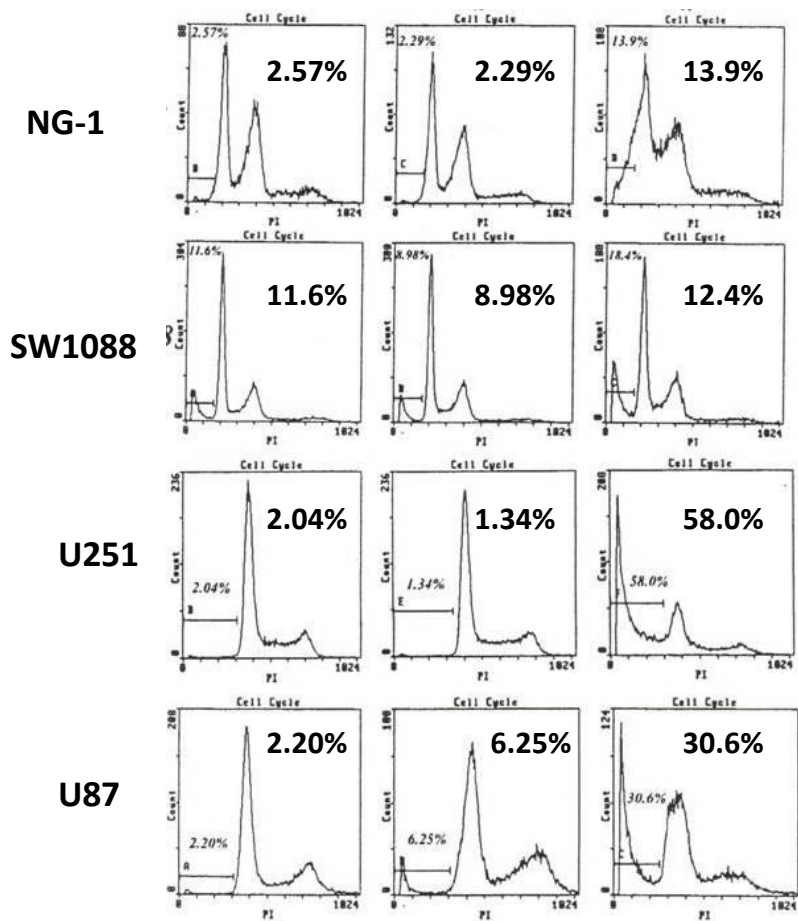

Supplement: MOESM3 [file 9540288]
